# Supplementary material
Source: PubMed Central journal article supplement (PMC3742554)
Supplement: NIHMS424347-supplement-supplement_1.pdf [file NIHMS424347-supplement-supplement_1.pdf]

**Supplementary Table 1.**

**Association between body composition markers and cognitive outcomes.**

**Multivariate regressions for cognitive domain scores by individual body composition markers, controlling for age and education. Partial correlation coefficients and p-values are provided.**

|                               |    | BMI<br>(kg/m <sup>2</sup> ) |       | Total Abdominal Fat<br>(mm <sup>2</sup> ) |       | Visceral Abdominal Fat<br>(mm <sup>2</sup> ) |              | Subcutaneous Abdominal Fat<br>(mm <sup>2</sup> ) |       | Total Fat<br>(g) |       | Muscle, Thigh<br>(mm <sup>2</sup> ) |              |
|-------------------------------|----|-----------------------------|-------|-------------------------------------------|-------|----------------------------------------------|--------------|--------------------------------------------------|-------|------------------|-------|-------------------------------------|--------------|
| <b>COGNITIVE DOMAIN</b>       | N  | partial r                   | p     | partial r                                 | p     | partial r                                    | p            | partial r                                        | p     | partial r        | p     | partial r                           | p            |
| <b>Executive Function</b>     | 49 | -0.15                       | 0.300 | -0.15                                     | 0.327 | -0.16                                        | 0.270        | -0.13                                            | 0.392 | -0.21            | 0.149 | -0.02                               | 0.895        |
| <b>Processing Speed</b>       | 49 | -0.12                       | 0.417 | -0.06                                     | 0.708 | -0.06                                        | 0.671        | -0.05                                            | 0.744 | -0.07            | 0.657 | -0.12                               | 0.406        |
| <b>Verbal Learning/Memory</b> | 48 | -0.25                       | 0.093 | -0.28                                     | 0.055 | <b>-0.33</b>                                 | <b>0.024</b> | -0.25                                            | 0.099 | -0.25            | 0.094 | <b>-0.38</b>                        | <b>0.012</b> |
| <b>Visual Memory</b>          | 45 | -0.11                       | 0.467 | -0.14                                     | 0.370 | -0.15                                        | 0.325        | -0.13                                            | 0.425 | -0.14            | 0.357 | -0.04                               | 0.794        |
| <b>Visuospatial Skills</b>    | 45 | -0.03                       | 0.837 | -0.07                                     | 0.672 | -0.17                                        | 0.289        | -0.04                                            | 0.821 | -0.05            | 0.760 | 0.20                                | 0.207        |

**Supplementary Table 2.****Association between hormones and cognitive outcomes.****Multivariate regressions for cognitive domain scores by individual hormone, controlling for age and education.****Partial correlation coefficients and p-values are provided.**

|                           | <b>Executive Function</b> |              | <b>Processing Speed</b> |       | <b>Verbal Learning/<br/>Memory</b> |       | <b>Visual Memory</b> |       | <b>Visuospatial Skills</b> |       |
|---------------------------|---------------------------|--------------|-------------------------|-------|------------------------------------|-------|----------------------|-------|----------------------------|-------|
|                           | partial r                 | p            | partial r               | p     | partial r                          | p     | partial r            | p     | partial r                  | p     |
| <b>Glucose Metabolism</b> |                           |              |                         |       |                                    |       |                      |       |                            |       |
| Insulin (AUC)             | -0.22                     | 0.149        | -0.11                   | 0.458 | 0.00                               | 0.983 | -0.02                | 0.917 | -0.04                      | 0.820 |
| Glucose (AUC)             | -0.07                     | 0.626        | -0.22                   | 0.147 | -0.14                              | 0.338 | -0.28                | 0.070 | 0.01                       | 0.945 |
| HOMA-IR                   | <b>-0.33</b>              | <b>0.024</b> | -0.15                   | 0.317 | 0.05                               | 0.762 | 0.00                 | 0.990 | 0.13                       | 0.396 |
| <b>Adipokines</b>         |                           |              |                         |       |                                    |       |                      |       |                            |       |
| Adiponectin (ug/ml)       | 0.26                      | 0.187        | 0.13                    | 0.526 | 0.01                               | 0.950 | 0.14                 | 0.492 | -0.03                      | 0.873 |
| Leptin (ng/ml)            | -0.35                     | 0.057        | -0.12                   | 0.545 | 0.07                               | 0.733 | -0.04                | 0.842 | -0.03                      | 0.863 |
| <b>IGF-1 Pathway</b>      |                           |              |                         |       |                                    |       |                      |       |                            |       |
| IGF-1 (ng/ml)             | -0.10                     | 0.520        | -0.15                   | 0.321 | -0.03                              | 0.833 | -0.19                | 0.230 | 0.03                       | 0.848 |
| <b>Gonadal Hormones</b>   |                           |              |                         |       |                                    |       |                      |       |                            |       |
| Free Estradiol (pg/ml)    | 0.14                      | 0.365        | 0.17                    | 0.286 | 0.07                               | 0.656 | -0.07                | 0.680 | -0.21                      | 0.197 |
| Estradiol (pg/dl)         | 0.19                      | 0.210        | 0.15                    | 0.335 | 0.12                               | 0.452 | -0.10                | 0.532 | -0.22                      | 0.174 |
| Free Testosterone (ng/dl) | 0.03                      | 0.859        | -0.19                   | 0.224 | 0.05                               | 0.776 | 0.07                 | 0.670 | 0.09                       | 0.579 |
| Testosterone (ng/dl)      | 0.21                      | 0.174        | -0.08                   | 0.598 | 0.05                               | 0.758 | 0.07                 | 0.648 | 0.02                       | 0.891 |
| <b>Vitamin D</b>          |                           |              |                         |       |                                    |       |                      |       |                            |       |
| Vitamin D (ng/ml)         | -0.04                     | 0.787        | -0.06                   | 0.673 | 0.02                               | 0.875 | -0.19                | 0.224 | -0.08                      | 0.595 |

N.B. For all hormones, N=45-49, except for the adipokines (N=30 for adiponectin and N=32 for leptin)

**Supplementary Table 3.**

**Nonparametric correlations between body composition measures and hormone levels (N=49). Spearman's Rho is provided. For all bolded values,  $p < 0.05$ .**

|                           | BMI<br>(kg/m <sup>2</sup> ) | SAT<br>(mm <sup>2</sup> ) | VAT<br>(mm <sup>2</sup> ) | TAT<br>(mm <sup>2</sup> ) | FAT<br>(g)  | Muscle<br>(mm <sup>2</sup> ) |
|---------------------------|-----------------------------|---------------------------|---------------------------|---------------------------|-------------|------------------------------|
| <b>Body Composition</b>   |                             |                           |                           |                           |             |                              |
| BMI                       | x                           | <b>0.89</b>               | <b>0.67</b>               | <b>0.91</b>               | <b>0.93</b> | <b>0.63</b>                  |
| SAT                       | <b>0.89</b>                 | x                         | <b>0.65</b>               | <b>0.97</b>               | <b>0.94</b> | <b>0.56</b>                  |
| VAT                       | <b>0.69</b>                 | <b>0.65</b>               | x                         | <b>0.79</b>               | <b>0.75</b> | <b>0.40</b>                  |
| TAT                       | <b>0.91</b>                 | <b>0.97</b>               | <b>0.79</b>               | x                         | <b>0.96</b> | <b>0.56</b>                  |
| FAT                       | <b>0.93</b>                 | <b>0.94</b>               | <b>0.75</b>               | <b>0.96</b>               | x           | <b>0.59</b>                  |
| Muscle                    | <b>0.63</b>                 | <b>0.54</b>               | <b>0.40</b>               | <b>0.56</b>               | <b>0.59</b> | x                            |
| <b>Glucose Metabolism</b> |                             |                           |                           |                           |             |                              |
| Insulin (AUC)             | <b>0.55</b>                 | <b>0.40</b>               | <b>0.52</b>               | <b>0.47</b>               | <b>0.52</b> | <b>0.52</b>                  |
| Glucose (AUC)             | <b>0.58</b>                 | <b>0.46</b>               | <b>0.58</b>               | <b>0.53</b>               | <b>0.54</b> | <b>0.37</b>                  |
| HOMA-IR                   | <b>0.54</b>                 | <b>0.52</b>               | <b>0.55</b>               | <b>0.57</b>               | <b>0.57</b> | <b>0.42</b>                  |
| <b>Adipokines</b>         |                             |                           |                           |                           |             |                              |
| Adiponectin (ug/ml)       | -0.20                       | -0.24                     | <b>-0.45</b>              | -0.31                     | -0.34       | -0.25                        |
| Leptin (ng/ml)            | <b>0.81</b>                 | <b>0.87</b>               | <b>0.74</b>               | <b>0.90</b>               | <b>0.90</b> | <b>0.39</b>                  |
| <b>IGF-1 Pathway</b>      |                             |                           |                           |                           |             |                              |
| IGF-1 (ng/ml)             | -0.27                       | -0.22                     | <b>-0.40</b>              | <b>-0.29</b>              | -0.23       | 0.16                         |
| <b>Gonadal Hormones</b>   |                             |                           |                           |                           |             |                              |
| Free Estradiol (pg/ml)    | 0.02                        | 0.06                      | 0.08                      | 0.05                      | 0.08        | -0.03                        |
| Estradiol (pg/dl)         | -0.10                       | -0.01                     | -0.03                     | -0.04                     | -0.03       | -0.19                        |
| Free Testosterone (ng/dl) | 0.17                        | 0.17                      | 0.15                      | 0.16                      | 0.15        | 0.25                         |
| Testosterone (ng/dl)      | 0.03                        | 0.09                      | 0.00                      | 0.06                      | 0.03        | -0.11                        |

| Vitamin D                 |              |             |              |              |              |              |             |              |             |             |           |
|---------------------------|--------------|-------------|--------------|--------------|--------------|--------------|-------------|--------------|-------------|-------------|-----------|
| Vitamin D (ng/ml)         | <b>-0.32</b> | -0.23       | -0.20        | -0.25        | -0.27        | <b>-0.37</b> |             |              |             |             |           |
|                           | Insulin      | Glucose     | HOMA-IR      | Adiponectin  | Leptin       | IGF-1        | Free E2     | E2           | Free T      | T           | Vitamin D |
| Glucose Metabolism        |              |             |              |              |              |              |             |              |             |             |           |
| Insulin (AUC)             | x            | <b>0.54</b> | <b>0.70</b>  | <b>-0.49</b> | <b>0.42</b>  | -0.05        | -0.07       | -0.29        | 0.26        | -0.08       | -0.18     |
| Glucose (AUC)             | <b>0.54</b>  | x           | <b>0.58</b>  | -0.33        | <b>0.47</b>  | -0.23        | 0.16        | -0.16        | 0.26        | .10         | 0.16      |
| HOMA-IR                   | <b>0.70</b>  | <b>0.58</b> | x            | <b>-0.52</b> | <b>0.68</b>  | -0.08        | -0.17       | <b>-0.31</b> | <b>0.34</b> | 0.13        | -0.14     |
| Adipokines                |              |             |              |              |              |              |             |              |             |             |           |
| Adiponectin (ug/ml)       | <b>-0.49</b> | -0.33       | <b>-0.52</b> | x            | <b>-0.39</b> | -0.01        | 0.12        | 0.28         | -0.02       | 0.30        | 0.01      |
| Leptin (ng/ml)            | <b>0.42</b>  | <b>0.47</b> | <b>0.68</b>  | <b>-0.39</b> | x            | -0.21        | 0.20        | 0.12         | <b>0.37</b> | 0.21        | -0.20     |
| IGF-1 Pathway             |              |             |              |              |              |              |             |              |             |             |           |
| IGF-1 (ng/ml)             | -0.05        | -0.23       | -0.08        | -0.01        | -0.21        | x            | 0.15        | 0.14         | 0.04        | -0.12       | 0.14      |
| Gonadal Hormones          |              |             |              |              |              |              |             |              |             |             |           |
| Free Estradiol (pg/ml)    | -0.07        | 0.16        | -0.17        | 0.12         | 0.20         | 0.15         | x           | <b>0.95</b>  | 0.13        | 0.23        | 0.13      |
| Estradiol (pg/dl)         | -0.29        | -0.16       | <b>-0.31</b> | 0.28         | 0.12         | 0.14         | <b>0.95</b> | x            | 0.02        | 0.27        | 0.20      |
| Free Testosterone (ng/dl) | 0.26         | 0.26        | <b>0.34</b>  | -0.02        | <b>0.37</b>  | 0.04         | 0.13        | 0.02         | x           | <b>0.75</b> | 0.21      |
| Testosterone (ng/dl)      | -0.08        | 0.10        | 0.13         | 0.30         | 0.21         | -0.12        | 0.23        | 0.27         | <b>0.75</b> | x           | -0.06     |
| Vitamin D                 |              |             |              |              |              |              |             |              |             |             |           |
| Vitamin D (ng/ml)         | -0.18        | 0.16        | -0.14        | 0.01         | -0.20        | 0.14         | 0.13        | 0.20         | -0.21       | -0.06       | x         |

N.B. For all hormones, N=45-49, except for the adipokines (N=30 for adiponectin and N=32 for leptin)
